# Supplementary material for: Machine Learning Algorithms Associate Case Numbers with SARS-CoV-2 Variants Rather Than with Impactful Mutations
Source: MDPI journal article supplement (doi:10.3390/v15061226), 2023-05-24
Supplement: s1 [file s1]

**Table S1. Means and standard errors of the case numbers per 100,000 people for each lag period and each dataset.**

| Lag (in days) | MN           |              | TX           |              | Combined     |              |
|---------------|--------------|--------------|--------------|--------------|--------------|--------------|
|               | mean         | sd           | mean         | sd           | mean         | sd           |
| 7             | 21.91        | 5.95         | 36.55        | 21.70        | 29.39        | 17.64        |
| 12            | 19.59        | 6.68         | 37.44        | 22.94        | 28.70        | 19.24        |
| 17            | 18.00        | 8.68         | <b>38.35</b> | <b>24.24</b> | 28.39        | 20.99        |
| 22            | 17.08        | 11.40        | 37.49        | 24.36        | 27.50        | 21.70        |
| 27            | 16.11        | 13.44        | 35.21        | 23.70        | 25.87        | 21.59        |
| 32            | 15.35        | 15.53        | 33.26        | 23.58        | <b>24.49</b> | <b>21.95</b> |
| 37            | 15.38        | 17.57        | 29.79        | 22.10        | 22.74        | 21.27        |
| 42            | 16.64        | 19.95        | 26.80        | 20.62        | 21.83        | 20.92        |
| 47            | 17.22        | 21.43        | 23.05        | 17.03        | 20.20        | 19.53        |
| 52            | <b>17.05</b> | <b>21.61</b> | 19.21        | 13.51        | 18.15        | 17.97        |
| 57            | 16.29        | 20.65        | 16.67        | 11.79        | 16.48        | 16.72        |
| 62            | 16.15        | 20.29        | 14.28        | 9.35         | 15.20        | 15.71        |
| 67            | 18.10        | 23.08        | 12.58        | 7.62         | 15.28        | 17.26        |
| 72            | 20.06        | 24.80        | 10.94        | 6.22         | 15.40        | 18.48        |

Notes—MN: Minnesota; TX: Texas; sd: standard error; bold: optimal lag for each dataset.
